# Supplementary material for: Extensive Thiol Profiling for Assessment of Intracellular Redox Status in Cultured Cells by HPLC-MS/MS
Source: MDPI journal article supplement (doi:10.3390/antiox11010024), 2021-12-23
Supplement: s1 [file s1]

# **Extensive thiol profiling for assessment of intracellular redox status in cultured cells by HPLC-MS/MS**

Jiandong Wu<sup>1</sup>, Anna Chernatynskaya<sup>1</sup>, Annalise Pfaff<sup>2</sup>, Huari Kou<sup>1</sup>, Nan Cen<sup>3</sup>, Nuran Ercal<sup>2\*</sup>,  
and Honglan Shi<sup>2\*</sup>

<sup>1</sup> Department of Chemical and Biochemical Engineering, Missouri University of Science and Technology, Rolla, Missouri 65409, United States

<sup>2</sup> Department of Chemistry, Missouri University of Science and Technology, Rolla, Missouri 65409, United States

<sup>3</sup> Department of Computer Science, Missouri University of Science and Technology, Rolla, Missouri 65409, United States

*\*Corresponding authors*

Nuran Ercal

Department of Chemistry

Missouri University of Science and Technology

400 W 11<sup>th</sup> Street

Rolla, MO 65409, USA

E-mail: [nercal@mst.edu](mailto:nercal@mst.edu)

Tel: 573-341-6950

Honglan Shi

Department of Chemistry

Missouri University of Science and Technology

400 West 11<sup>th</sup> Street

Rolla, MO 65409, USA

E-mail: [honglan@mst.edu](mailto:honglan@mst.edu)

Tel: 573-341-4433

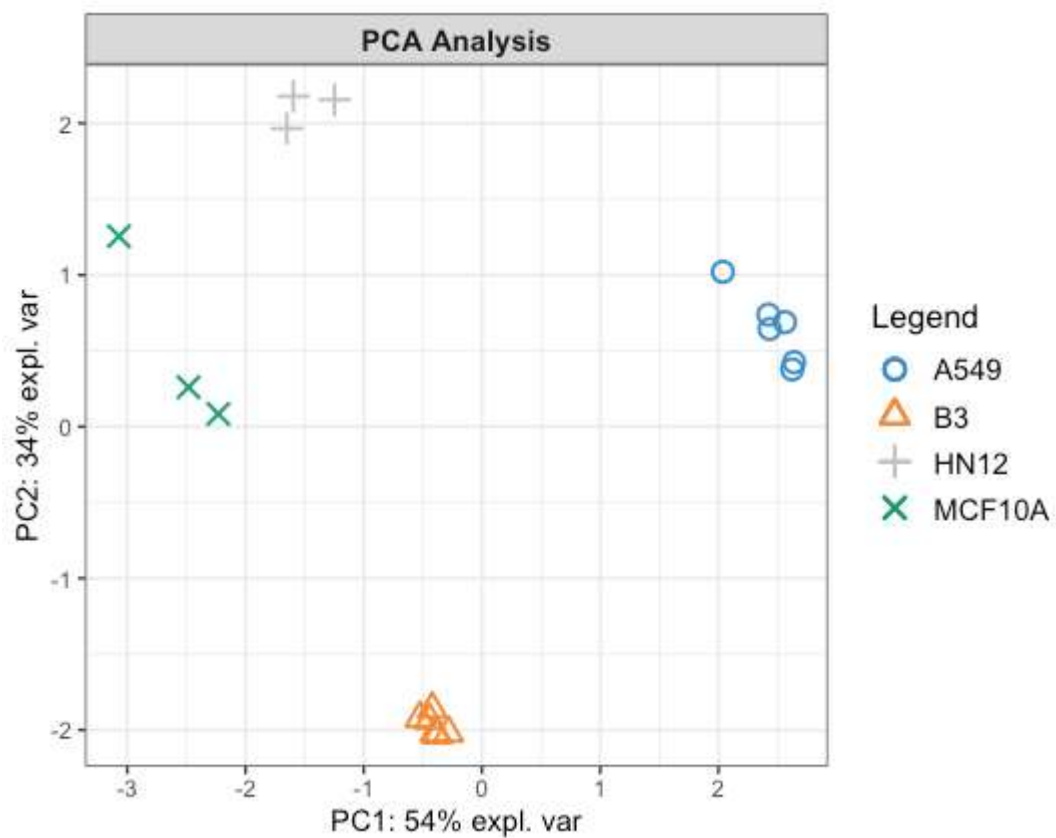

Figure S1. Principal component analysis of thiol profiling of different cells.

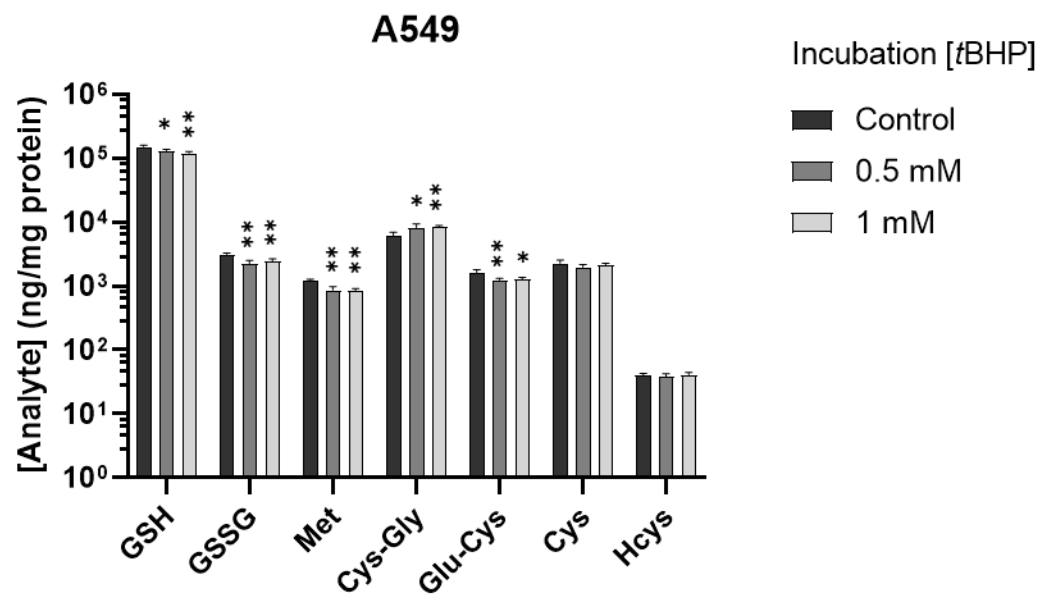

Figure S2. Alteration of analytes in A549 cells after 2-hour *t*BHP treatment (n=6). \*,  $p < 0.05$ ; \*\*,  $p < 0.001$ .

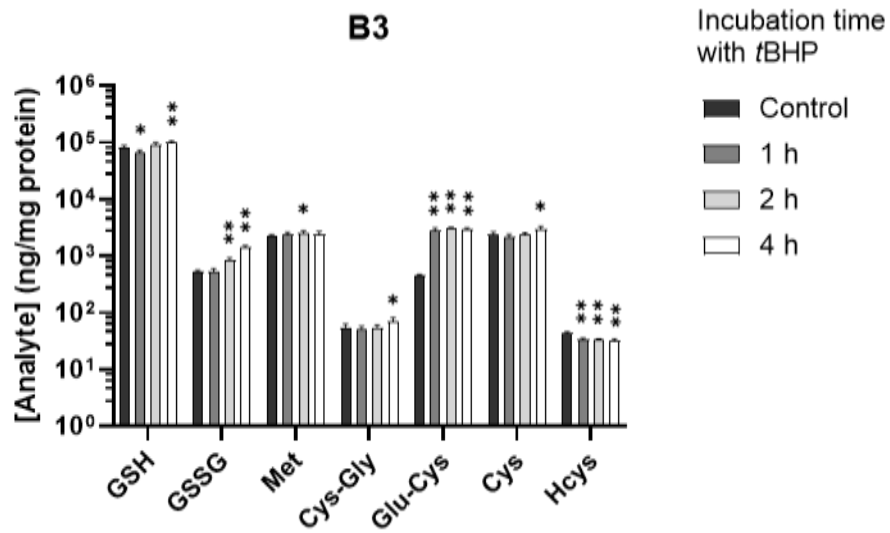

Figure S3. Alteration of analytes in B3 cells after 0.5mM *t*BHP treatment (n=6). \*,  $p < 0.05$ ; \*\*,  $p < 0.001$ .

Table S1. Concentrations of analytes in different cell lines (mean  $\pm$  SD, ng/mg protein, n = 3).

| Tissue    | Lens           | Lung           | Breast         | Head/Neck      |
|-----------|----------------|----------------|----------------|----------------|
| Cell line | B3*            | A549*          | MCF10A         | HN12           |
| GSH**     | 83 $\pm$ 7     | 152 $\pm$ 10   | 48 $\pm$ 5     | 45 $\pm$ 5     |
| GSSG      | 527 $\pm$ 34   | 3145 $\pm$ 150 | 543 $\pm$ 41   | 1561 $\pm$ 262 |
| Cys-Gly   | 54 $\pm$ 9     | 6100 $\pm$ 868 | 25 $\pm$ 5     | 3800 $\pm$ 364 |
| Glu-Cys   | 450 $\pm$ 28   | 1624 $\pm$ 183 | 99 $\pm$ 21    | 233 $\pm$ 14   |
| Met       | 2326 $\pm$ 66  | 1225 $\pm$ 66  | 1191 $\pm$ 217 | 1618 $\pm$ 22  |
| Cys       | 2447 $\pm$ 229 | 2275 $\pm$ 285 | 1678 $\pm$ 388 | 697 $\pm$ 66   |
| Hcys      | 45 $\pm$ 2     | 40 $\pm$ 3     | 11 $\pm$ 2     | 14 $\pm$ 1     |

\*, n = 6 for B3 and A549; \*\*,  $\mu$ g/mg protein.
